# Supplementary material
Source: Elsevier journal article supplement (https://www.sciencedirect.com/science/article/pii/S1695403316302697)
Supplement: mmc1 [file S1695403316302697:mmc1.docx]

**Anexo 1. Comparación en las prácticas alimentarias entre hospitales de más y de menos de 50 ingresos anuales <1500g .**

*Para calcular las tasas en RN < 28 semanas en hospitales con menos de 50 ingresos, se incluye en el denominador sólo las 25 unidades que atienden a este grupo de niños. Así mismo, la N total sumatoria de ambos tipos de Unidades queda también modificada a 55 en esos ítems.

| Unidades | Unidades grandes(N= 30)  n(%) | Unidades  pequeñas(N=30)  n(%) | Significación estadística  (P) |
| --- | --- | --- | --- |
| Atienden <28 sem/1000 g | 30 (100) | 25 (83) |  |
| Disposición de protocolo escrito | 22 (73) | 18 (60) | NS |
| Disponibilidad de leche donada | 10 (33) | 5 (17) | NS |
| Existe variabilidad en su unidad | 16 (53) | 13 (43) | NS |
| Inicio alimentación en primeras 24 h:   - en Rn<25 sem estables*: - en RN 25-27 sem estables* - en RN 28-31 sem estables | 8 (27)  15 (25)  24 (80) | 7 (28)  14 (56)  24 (80) | NS  NS  NS |
| Uso de alimentación trófica   - en RN<25 sem* - en RN 25-27 sem* - en RN 28-31 sem | 14 (47)  7 (23)  1 (2) | 15 (60)  12 (48)  2 (7) | NS  NS  NS |
| Retrasan inicio alimentación:   - si no hay Leche materna - si diagnóstico prenatal CIR en RN<32 sem | 10 (33)  14 (47) | 11 (37)  8 (27) | NS  NS |
| - si flujo patológico en Arteria umbilical - si asfixia perinatal | 14 (47)  27 (90) | 12 (40)  26 (87) | NS  NS |
| - hasta eliminación meconio - si caterización de Arteria Umbilical | 2 (7)  5 (17) | 3 (10)  5 (17) | NS  NS |
| Modo de Alimentación (Nutrición Enteral a Débito Continuo(NEDC) vs bolus):   - NEDC en RN<25 sem* | 7 (23) | 12 (48) | NS |
| - NEDC en RN 25-27 sem* | 5 (17) | 12 (48) | **P= 0,045** |
| - NEDC en RN 28-31 sem | 3 (10) | 4 (13) | NS |
| Volumen de los incrementos en RN<25 sem*   - 10cc/Kg/día* - 20cc/Kg/día* | 17 (57)  13 (43) | 14 (56)  11 (44) | NS  NS |
| Volumen de los incrementos en RN 25-27 sem*   - 10cc/Kg/día* - 20cc/Kg/día* | 12 (40)  18 (60) | 11 (44)  14 (56) | NS  NS |
| Volumen de los incrementos en RN 28-31 sem   - 10cc/Kg/día - 20cc/Kg/día - 30cc/Kg/día | 6 (20)  20 (67)  4 (13) | 5 (17)  17 (57)  7 (23) | NS  NS  NS |
| Volumen final con leche materna exclusiva   - 140-160cc/kg/día - 161-180cc/Kg/día - 181-200cc/Kg/día | 1 (3)  11 (37)  14 (46) | 1 (3)  8 (27)  20 (67) | NS  NS  NS |
| Volumen final con leche materna fortificada   - 140-160cc/kg/día - 161-180cc/Kg/día - 181-200cc/Kg/día | 6 (20)  15 (50)  9 (30) | 5 (16,6)  15 (50)  8 (27) | NS  NS  NS |
| Volumen final con Fórmula de prematuro   - 140-160cc/kg/día - 161-180cc/Kg/día - 181-200cc/Kg/día | 11 (37)  14 (47)  5 (17) | 10 (33)  14 (47)  6 (20) | NS  NS  NS |
| Utilización habitual de fortificante | 29 (97) | 27 (90) | NS |
| Cuándo se inicia el uso de fortificante?   - Al alcanzar un volumen determinado | 30 (100) | 24 (80) | NS |
| Cuándo se suspende el fortificante   - Al alcanzar un peso determinado - Al alcanzar una edad determinada - Al alcanzar lactancia materna al pecho - Al alta hospitalaria | 3 (10)  2 (6,6)  18 (60)  4 (13) | 11 (37)  2 (7)  14 (47)  2 (7) | **P=0,015**  NS  NS  NS |
| Inicio del fortificante a dosis progresivas | 17 (57) | 20 (67) | NS |
| Preparación del fortificante en cada toma | 21 (70) | 20 (67) | NS |
| Uso de vitaminas | 30 (100) | 27 (90) |  |
| Qué vitamina se usa   - Polivitamínico - Vitamina D | 13 (43)  8 (27) | 8 (27)  15 (50) | NS  NS |
| Fortificante al alta en RN<1000g con LM exclusiva | 2 (7) | 7 (28) | NS |
| Tipo de fórmula al alta si no hay leche materna   - Fórmula de prematuro - Fórmula de inicio - Fórmula de bajo peso | 20 (67)  5 (17)  4 (13) | 23 (77)  4 (13)  2 (7) | NS  NS  NS |
